# Supplementary material for: Activation of a dormant replication origin is essential for Haloferax mediterranei lacking the primary origins
Source: PubMed Central journal article supplement (PMC4595724; doi:10.1038/ncomms9321), 2015-09-16
Supplement: ncomms9321-s1.pdf [file ncomms9321-s1.pdf]

## Supplementary Figures

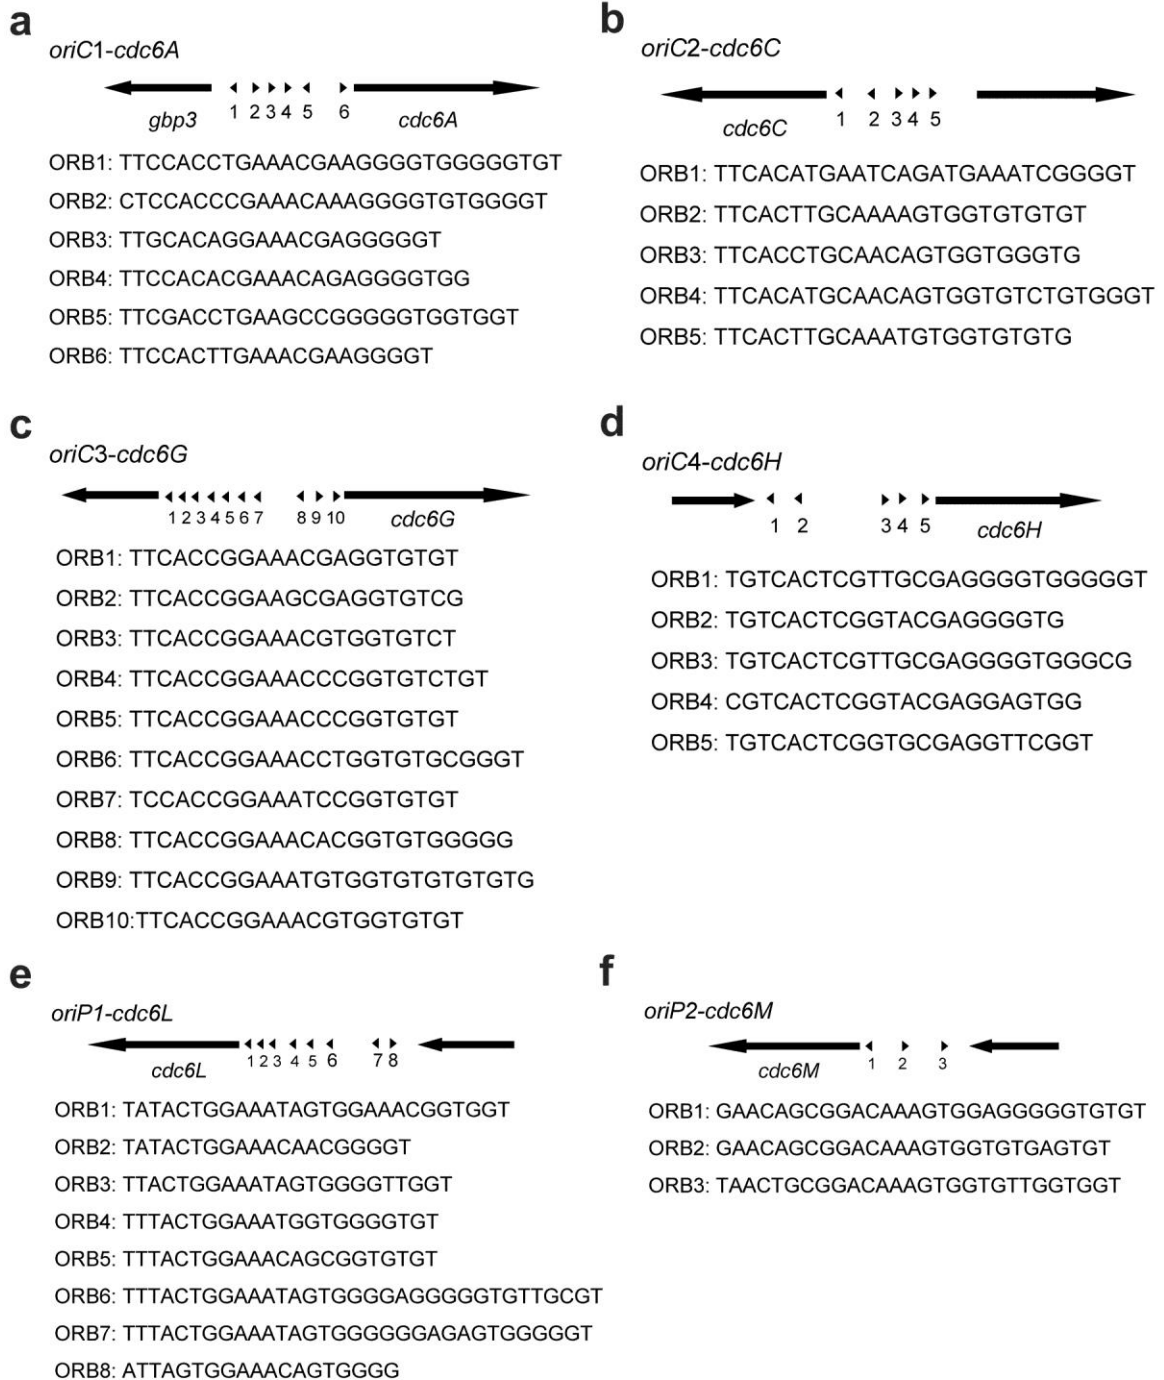

**Supplementary Figure 1 | The ORB elements of the replication origins on the chromosome and on pHM500.** The transcriptional direction of the genes flanking the origins is indicated by arrows, and the orientation of the ORBs within the origins is indicated by triangles.

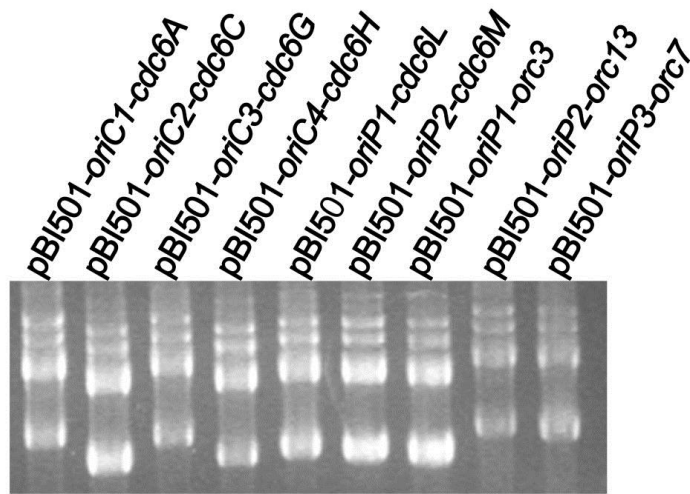

**Supplementary Figure 2 | Retransferring the ARS plasmids from *H. mediterranei* transformants back to *E. coli*.** The corresponding *H. mediterranei* transformant collected from the plate was lysed with 200  $\mu$ L double-distilled H<sub>2</sub>O and 100  $\mu$ L phenol-chloroform, and the extracted plasmid in the supernatant was transferred into *E. coli*. The ARS plasmids were then extracted from *E. coli* and analysed by agarose gel electrophoresis.

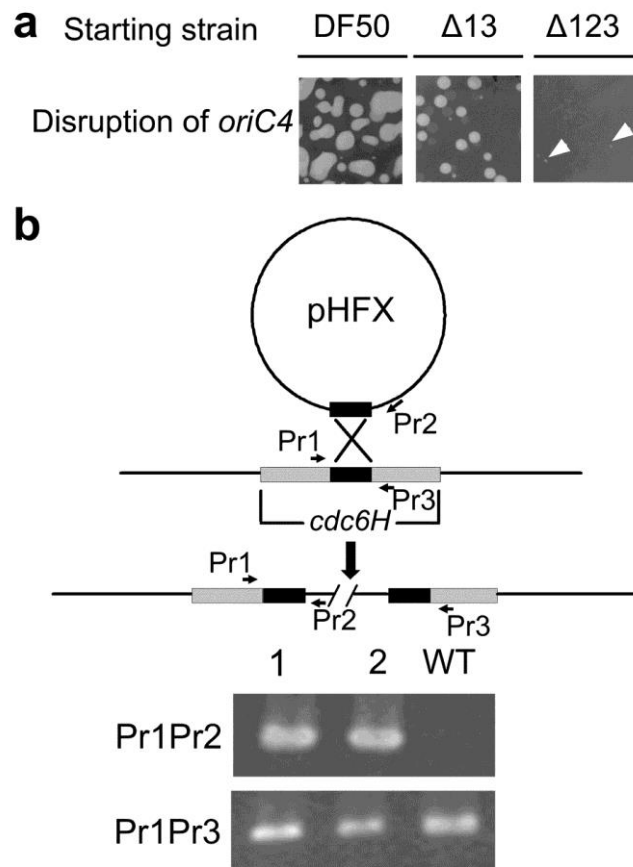

**Supplementary Figure 3 | The disruption of *oriC4-cdc6H* in DF50, DF50 $\Delta$ *oriC1* $\Delta$ *oriC3* and DF50 $\Delta$ *oriC1* $\Delta$ *oriC2* $\Delta$ *oriC3*.** (a) Transformation of pHFX-*cdc6H*-dis (Supplementary Table 1) into DF50, DF50 $\Delta$ *oriC1* $\Delta$ *oriC3* ( $\Delta 13$ ) and DF50 $\Delta$ *oriC1* $\Delta$ *oriC2* $\Delta$ *oriC3* ( $\Delta 123$ ). Colonies were observed after 4-5 days at 37°C. Disruption of *oriC4-cdc6H* in DF50 $\Delta$ *oriC1* $\Delta$ *oriC2* $\Delta$ *oriC3* only resulted in sporadic and tiny colonies (indicated with white arrowheads), compared to those of DF50 and DF50 $\Delta$ *oriC1* $\Delta$ *oriC3*. (b) PCR analysis of the disruption of *oriC4-cdc6H*. Upper panel: a schematic diagram of the disruption of *oriC4-cdc6H* via the single crossover method. Primers Pr1 and Pr2 were designed to confirm the integration of pHFX-*cdc6H*-dis at the *cdc6H* locus, and Pr1 and Pr3 were designed to determine the presence or absence of intact *cdc6H* genes (Supplementary Table 1). Lower panel: PCR analyses of chromosomal DNA prepared from the tiny colonies resulting from the disruption of *oriC4-cdc6H* in DF50 $\Delta$ *oriC1* $\Delta$ *oriC2* $\Delta$ *oriC3*. Lanes 1, 2 represent transformants of DF50 $\Delta$ *oriC1* $\Delta$ *oriC2* $\Delta$ *oriC3* and lane WT represents DF50. The PCR results are similar for the disruption of *oriC4-cdc6H* in DF50 and DF50 $\Delta$ *oriC1* $\Delta$ *oriC3* (not shown).

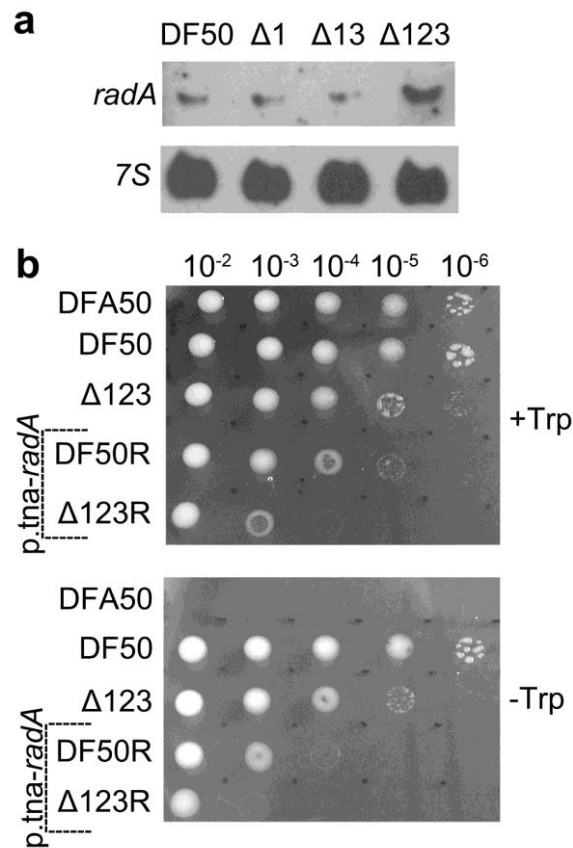

**Supplementary Figure 4 | RadA is important but not essential for the growth of DF50 $\Delta$ oriC1 $\Delta$ oriC2 $\Delta$ oriC3.** (a) Northern blot analysis of the *radA* transcript in DF50, DF50 $\Delta$ oriC1 ( $\Delta$ 1), DF50 $\Delta$ oriC1 $\Delta$ oriC3 ( $\Delta$ 13) and DF50 $\Delta$ oriC1 $\Delta$ oriC2 $\Delta$ oriC3 ( $\Delta$ 123). The 7S transcripts are served as internal control. The total RNA was extracted from *H. mediterranei* during the exponential phase ( $OD_{600} \approx 0.35$ ) with the TRIzol reagent. Northern blot analysis was performed as previously described<sup>1</sup>. The probes specific to *radA* and 7S RNA were labeled with Biotin-11-dUTP (Thermo Scientific, R0081) by PCR. The signals were detected with the chemiluminescent nucleic acid detection module according to the manufacturer's protocol (Thermo Scientific, Rockford, USA). (b) Serial dilutions of stationary phase cells (in equal amounts) were spotted onto AS-168SY plates (supplemented with uracil) with (+Trp) or without (-Trp) tryptophan. *radA* was placed under the control of the tryptophan-inducible p.tna promoter in DF50R and DF50 $\Delta$ oriC1 $\Delta$ oriC2 $\Delta$ oriC3R ( $\Delta$ 123R). DFA50 (auxotrophic for tryptophan), DF50 and DF50 $\Delta$ oriC1 $\Delta$ oriC2 $\Delta$ oriC3 ( $\Delta$ 123) were used as controls. The growth of DF50R and DF50 $\Delta$ oriC1 $\Delta$ oriC2 $\Delta$ oriC3R were seriously affected by the absence of tryptophan but not to the lethal degree. The t.L11e terminator associated with p.tna promoter was placed upstream of *radA* ORF via double-crossover method with plasmid pBI501-ptnaradA (Supplementary Table 1).

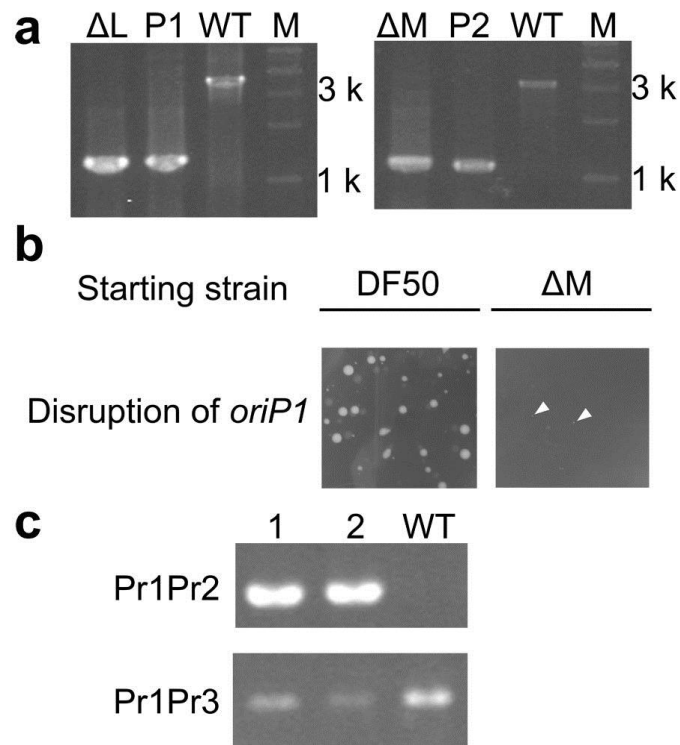

**Supplementary Figure 5 | Importance of the *oriP1-cdc6L* for cell growth in the absence of *oriP2-cdc6M*.** (a) Origin deletion strains were confirmed by PCR analyses. Lanes  $\Delta L$  and  $\Delta M$  represent the knockout of *oriP1-cdc6L* and *oriP2-cdc6M*, respectively; lanes P1 and P2 represent the plasmids used for deleting *oriP1-cdc6L* and *oriP2-cdc6M*, respectively; lane WT represents DF50. (b) Disruption of *oriP1-cdc6L* in DF50 and DF50 $\Delta$ *oriP2-cdc6M*. Transformation of pHFX-*cdc6L*-dis (Supplementary Table 1) into DF50 and DF50 $\Delta$ *oriP2-cdc6M* and colonies were observed after 4-5 days at 37°C. Disruption of *oriP1-cdc6L* in DF50 $\Delta$ *oriP2-cdc6M* resulted in sporadic and tiny colonies (indicated with white arrowheads), compared to that of DF50. (c) PCR analyses of the chromosomal DNA prepared from the tiny colonies resulting from disruption of *oriP1-cdc6L* in DF50 $\Delta$ *oriP2-cdc6M*. Lanes 1 and 2 represent transformants of DF50 $\Delta$ *oriP2-cdc6M*, and lane WT represents DF50. The position of primers Pr1, Pr2, and Pr3 and the rationale for the primer design were similar to that of Supplementary Fig. 3b (Supplementary Table 1).

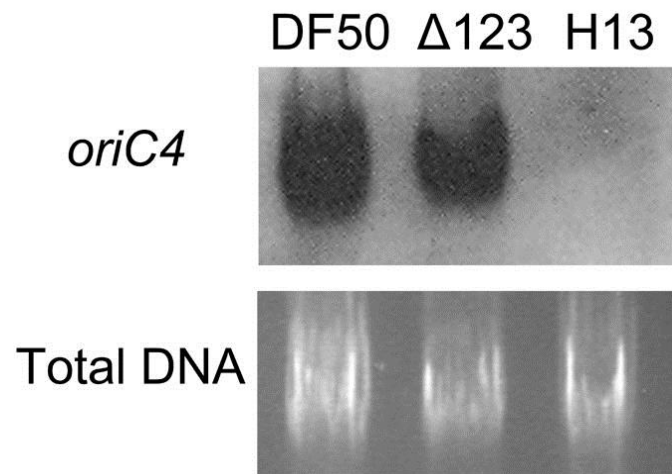

**Supplementary Figure 6 | Confirmation of the absence of *oriC4* in H13 by Southern blot analysis with an *oriC4*-specific probe. DF50 and DF50 $\Delta$ *oriC1* $\Delta$ *oriC2* $\Delta$ *oriC3* ( $\Delta$ 123) were selected as positive controls for *oriC4*. The total DNA was shown as loading control.**

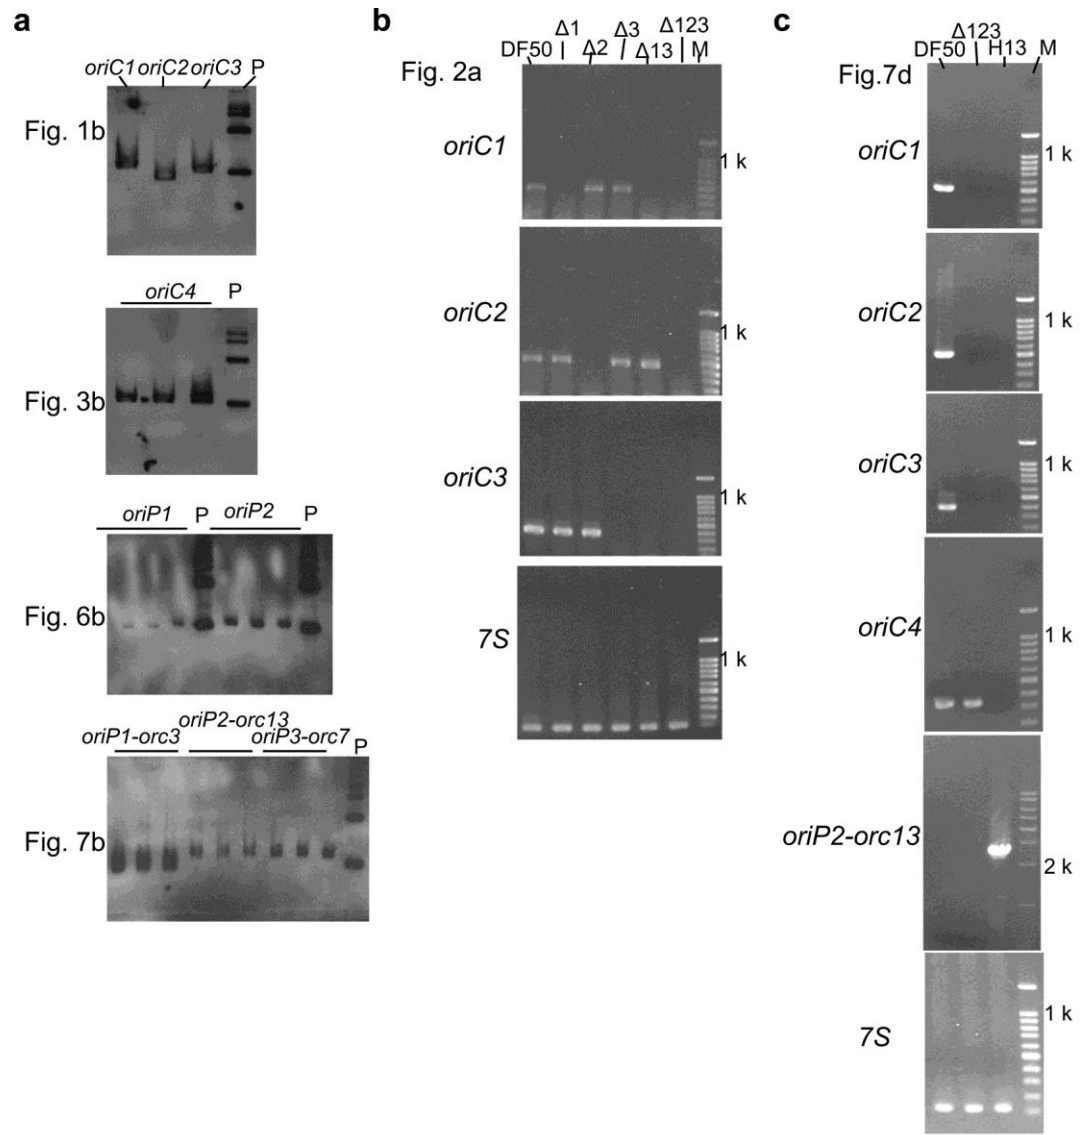

**Supplementary Figure 7 | Full-length, uncropped Southern blot and agarose gel electrophoresis images for Figures 1 to 7.** (a) Full length, uncropped images of Southern blot for figures 1b, 3b, 6b, and 7b. (b) Full length, uncropped images of agarose gel electrophoresis for Fig. 2a. (c) Full length, uncropped images of agarose gel electrophoresis for Fig. 7d.

## Supplementary Tables

**Supplementary Table 1.** Oligonucleotides and constructed plasmids

| Plasmids and oligonucleotides for knockout experiments |                 |                         |                                          |
|--------------------------------------------------------|-----------------|-------------------------|------------------------------------------|
| Plasmid                                                | Primer position | Primer name             | Sequence (5'-3')*                        |
| pHFXΔ <i>oriC1-cdc6A</i>                               | 5' forward      | AFP1-PstI               | AAA <b>ACTGCAG</b> ACCTTCGTCGTGACACCC    |
|                                                        | 5' reverse      | AFP2-BamHI              | CGCG <b>GGATCCC</b> GAACAGCGTCAGGAGAA    |
|                                                        | 3' forward      | APP3-BamHI              | CGCG <b>GGATCCT</b> GGAGTGTGGAGTGGACT    |
|                                                        | 3' reverse      | APP4-KpnI               | ATAG <b>GGTACCG</b> AGAAGGGCTCAGAAGTCG   |
| pHFXΔ <i>oriC2-cdc6C</i>                               | 5' forward      | CFP1-PstI               | AAA <b>ACTGCAG</b> CTCCTCACGGGCATCTG     |
|                                                        | 5' reverse      | CFP2-BamHI              | CGCG <b>GGATCCT</b> CAACAAAATAACCGAAACG  |
|                                                        | 3' forward      | CPP1-BamHI              | CGCG <b>GGATCCG</b> CCTCGCTCAGAAACCC     |
|                                                        | 3' reverse      | CPP2-KpnI               | ATAG <b>GGTACC</b> AGCAGGAGACCGAACACC    |
| pHFXΔ <i>oriC3-cdc6G</i>                               | 5' forward      | GFP1-PstI               | AAA <b>ACTGCAG</b> AGAAAGTGCTGGGTTCGC    |
|                                                        | 5' reverse      | GFP2b-BamHI             | CGCG <b>GGATCC</b> AGTTCTGCCGACTCATCTCTA |
|                                                        | 3' forward      | GPP3-BamHI              | CGCG <b>GGATCCG</b> ACCGACCCAGTCACTACTTT |
|                                                        | 3' reverse      | GPP4-KpnI               | ATAG <b>GGTACCC</b> AGAGCGAATGCGTGAAT    |
| pHFXΔ <i>oriC4-cdc6H</i>                               | 5' forward      | HFP3-BamHI              | CGCG <b>GGATCCG</b> GTTCGGGTGAAGGACAG    |
|                                                        | 5' reverse      | HFP4                    | CTACCACAACATCTCGAAGGATGGTTCGCTGAATA      |
|                                                        | 3' forward      | HPP1'                   | AGCGAACCATCCTTCGAGATGTTGTGGTAGCTCCTG     |
|                                                        | 3' reverse      | HPP2-KpnI               | ATAG <b>GGTACCC</b> GACCGCGATGCCTGATCT   |
| pHFXΔ <i>oriP1-cdc6L</i>                               | 5' forward      | LFP1-PstI               | AAA <b>ACTGCAG</b> AATCACCTCCTCGTTTCGG   |
|                                                        | 5' reverse      | LFP2                    | CGCTCTTGTATCTACTCCTACGGAACCCAACACT       |
|                                                        | 3' forward      | LPP1                    | TTGGGTTCGGTAGGAGTAGATACAAGAGCGGCACG      |
|                                                        | 3' reverse      | LPP2-BamHI              | CGCG <b>GGATCCG</b> TTGACTGAGACCGCATC    |
| pHFXΔ <i>oriP2-cdc6M</i>                               | 5' forward      | MFP1-PstI               | AAA <b>ACTGCAG</b> GTCTCGCCTTCAGTGTCTG   |
|                                                        | 5' reverse      | MFP2-BamHI              | CGCG <b>GGATCCG</b> GAAACCACGGAAGAGCC    |
|                                                        | 3' forward      | MPP1-BamHI              | CGCG <b>GGATCCCA</b> ACGAAATACCTTGTTGACC |
|                                                        | 3' reverse      | MPP2-KpnI               | ATAG <b>GGTACCC</b> GATGGCAGTTGTAGCGT    |
| pHFXΔ <i>oriC1</i>                                     | 5' forward      | the same as AFP1-PstI   |                                          |
|                                                        | 5' reverse      | the same as AFP2-BamHI  |                                          |
|                                                        | 3' forward      | APP1-BamHI              | CGCG <b>GGATCCT</b> CATCTGGAATCGCCTTCT   |
|                                                        | 3' reverse      | APP2-KpnI               | ATAG <b>GGTACC</b> CTGCGAGGTAGACTCCAGTT  |
| pHFXΔ <i>oriC2</i>                                     | 5' forward      | CFP3-PstI               | AAA <b>ACTGCAG</b> ACCGATGAGACCGACTTTC   |
|                                                        | 5' reverse      | CFP4-BamHI              | CGCG <b>GGATCCC</b> ACCCTGATGAATGGAACC   |
|                                                        | 3' forward      | the same as CPP1-BamHI  |                                          |
|                                                        | 3' reverse      | the same as CPP2-KpnI   |                                          |
| pHFXΔ <i>oriC3</i>                                     | 5' forward      | the same as GFP1-PstI   |                                          |
|                                                        | 5' reverse      | the same as GFP2b-BamHI |                                          |
|                                                        | 3' forward      | GPP1a-BamHI             | CGCG <b>GGATCCT</b> CTCCACTTCTCCCATCTTG  |
|                                                        | 3' reverse      | GPP2-KpnI               | ATAG <b>GGTACCT</b> GACGCCGAGTTTACAGC    |



|                                                                                 |                                                                                                        |                        |                                             |
|---------------------------------------------------------------------------------|--------------------------------------------------------------------------------------------------------|------------------------|---------------------------------------------|
| pHFX $\Delta$ <i>oriC4</i>                                                      | 5' forward                                                                                             | HFP1-PstI              | AAA <b>ACTGCAGC</b> GAGGATGACCACGAAGAC      |
|                                                                                 | 5' reverse                                                                                             | HFP2-BamHI             | CGCG <b>GATCC</b> GGTCGTCAACATAGAATCACA     |
|                                                                                 | 3' forward                                                                                             | HPP1-BamHI             | CGCG <b>GATCC</b> GAGATGTTGTGGTAGCTCCTG     |
|                                                                                 | 3' reverse                                                                                             | the same as HPP2-KpnI  |                                             |
| pHFX $\Delta$ <i>trpA</i>                                                       | 5' forward                                                                                             | trpAFP1-BamHI          | CGCG <b>GATCC</b> GCAAGCCCACGAGCAGAT        |
|                                                                                 | 5' reverse                                                                                             | trpAFP2                | AGGGTGACAGAGCAGATTACAGTCCCCCGTGAAC          |
|                                                                                 | 3' forward                                                                                             | trpAPP1                | CGGGGGACTGTAATCTGCTCTGTCACCCTTTCTC          |
|                                                                                 | 3' reverse                                                                                             | trpAPP2-KpnI           | ATAG <b>GGTACC</b> CGTCGTGCTGGAAGATAGAC     |
| Plasmids and oligonucleotides for <i>trpA</i> -marked positive selection system |                                                                                                        |                        |                                             |
| Plasmid                                                                         | Description                                                                                            | Primer name            | Sequence (5'-3')*                           |
| pBI501                                                                          | pUCmT <sup>2</sup> with insertion of <i>pyrF</i> marker at EcoR I-Kpn I sites                          |                        |                                             |
| pSCM307:: <i>trpA</i>                                                           | pSCM307 <sup>3</sup> with insertion of <i>trpA</i> at the 3' end of the <i>hsp5</i> promoter           | trpAFP-NdeI            | GGAATTC <b>CA</b> TATGATGTCGCTCGAAGACGCC    |
|                                                                                 |                                                                                                        | trpARP-PstI            | AAA <b>ACTGCAG</b> TTATGTGCGTTCCGAATGC      |
| pHFA101                                                                         | pBI501 with insertion of <i>Phsp5-trpA</i> at BamHI-NcoI sites                                         | hsptrpAFP-BamHI        | AAT <b>GGATCC</b> TCCGTCTGGGAATTCGAT        |
|                                                                                 |                                                                                                        | hsptrpARP-NcoI         | CAT <b>GCCATG</b> GTATGTGCGTTCCGAATGC       |
| pHFA101 $\Delta$ <i>oriC4</i>                                                   | pHFA101 with insertion of upstream and downstream fragments of <i>oriC4</i> flanking <i>Phsp5-trpA</i> | the same as HFP1-PstI  |                                             |
|                                                                                 |                                                                                                        | the same as HFP2-BamHI |                                             |
|                                                                                 |                                                                                                        | HPP1-NcoI              | CAT <b>GCCATG</b> GGAGATGTTGTGGTAGCTCCTG    |
|                                                                                 |                                                                                                        | the same as HPP2-KpnI  |                                             |
| pHFA101- $\Delta$ <i>oriC4-cdc6H</i> :: <i>oriP2-orc13</i>                      | amplification of upstream fragment of <i>oriC4-cdc6H</i>                                               | HFP1a-XbaI             | CTAGTCT <b>AGAGA</b> AAGGAGGATACTGGTTGGG    |
|                                                                                 |                                                                                                        | HFP2-BamHI             | CGCG <b>GATCC</b> GGTCGTCAACATAGAATCACA     |
|                                                                                 | amplification of <i>oriP2-orc13</i>                                                                    | orc13+FP-NcoI          | CAT <b>GCCATG</b> GGGACGGCACATCACATACAA     |
|                                                                                 |                                                                                                        | orc13+FP2-EcoRV        | CTGCG <b>ATATC</b> GCTGGGATCGGAATGATG       |
|                                                                                 | amplification of downstream fragment of <i>oriC4-cdc6H</i>                                             | HPP1-EcoRV             | CTGCG <b>ATATC</b> GAGATGTTGTGGTAGCTCCTG    |
|                                                                                 |                                                                                                        | HPP2a-KpnI             | ATAG <b>GGTACC</b> CTCCAACCTGTTTCGCCTACC    |
| Plasmids and oligonucleotides for <i>radA</i> promoter replacement              |                                                                                                        |                        |                                             |
| Plasmid                                                                         | Description                                                                                            | Primer name            | Sequence (5'-3')*                           |
| pTA1228- <i>radA</i>                                                            | pTA1228 <sup>4</sup> with                                                                              | radA-FP-NdeI           | GGAATTC <b>CA</b> TATGGCAGAAGACGACCTCGAAAAT |

|                                                               |                                                                        |                                         |                                          |
|---------------------------------------------------------------|------------------------------------------------------------------------|-----------------------------------------|------------------------------------------|
|                                                               | <i>radA</i> at the downstream of p.tna promoter                        | radA-RP-NotI                            | ATAAGAATGCGGCCGCAATCTATTCTGGGCTTGAGACC   |
| pBI501-ptnaradA                                               | amplification of upstream fragment of <i>radA</i> promoter             | radAFP1-PstI                            | AAA <b>ACTGCAG</b> CGCCTTCTCGCTGCTCTC    |
|                                                               |                                                                        | radAFP2-BamHI                           | CG <b>CGGAT</b> CCCCGCCCATACCCACATAA     |
|                                                               | amplification of t.L11e & p.tna- <i>radA</i> from pTA1228- <i>radA</i> | ptna-radAFP-BamHI                       | CG <b>CGGAT</b> CCACTCACTATAGGGCGAATTGG  |
|                                                               |                                                                        | ptna-radARP-NcoI                        | CATGCCAT <b>GG</b> GAGGAGAATCTGGTGGTTGGA |
| Plasmids and oligonucleotides for gene disruption experiments |                                                                        |                                         |                                          |
| Plasmid                                                       | Primer name                                                            | Sequence (5'-3')*                       |                                          |
| pHFX- <i>cdc6H</i> -dis                                       | HFPdis-BamHI                                                           | CG <b>CGGAT</b> CCAGGTCTTGAAACGCTTGA    |                                          |
|                                                               | HRPdis-KpnI                                                            | ATAG <b>GGT</b> ACCCGACGAACTCGCTCCATC   |                                          |
| pHFX- <i>cdc6L</i> -dis                                       | LFP2dis-BamHI                                                          | CG <b>CGGAT</b> CCTCGTGTTCGGTGAGGTCCG   |                                          |
|                                                               | LRP2dis-KpnI                                                           | ATAG <b>GGT</b> ACCTCCGCAGTCCAAGGTCTAT  |                                          |
| Plasmids and oligonucleotides for ARS assays                  |                                                                        |                                         |                                          |
| Plasmid                                                       | Primer name                                                            | Sequence (5'-3')*                       |                                          |
| pBI501- <i>oriC1-cdc6A</i>                                    | Cdc6A+FP1-BamHI                                                        | CG <b>CGGAT</b> CCTGTTTCGTCTCACCTTTCCT  |                                          |
|                                                               | Cdc6A+PP2-KpnI                                                         | ATAG <b>GGT</b> ACCGTCCGTAATCCGTATCTCG  |                                          |
| pBI501- <i>oriC2-cdc6C</i>                                    | Cdc6C+FP2-BamHI                                                        | CG <b>CGGAT</b> CCTTGACTCAGACCGCTTCCG   |                                          |
|                                                               | OriC2FP2-KpnI                                                          | ATAG <b>GGT</b> ACCTCGAGGCTATTCAAAGGGA  |                                          |
| pBI501- <i>oriC3-cdc6G</i>                                    | Cdc6G+FP1-BamHI                                                        | CG <b>CGGAT</b> CCCCTGCTTGTGGTGCTTCTC   |                                          |
|                                                               | Cdc6G+PP1-NcoI                                                         | CATGCCAT <b>GGG</b> TCACAAAATACCGCAACAA |                                          |
| pBI501- <i>oriC4-cdc6H</i>                                    | Cdc6H+FP1-BamHI                                                        | CG <b>CGGAT</b> CCCGAGGGTCTGGATTAGTTTC  |                                          |
|                                                               | Cdc6H+PP1-KpnI                                                         | ATAG <b>GGT</b> ACCTCGTCGAATCTCGAACCG   |                                          |
| pBI501- <i>oriC4</i>                                          | oriC4-FP-BamHI                                                         | CG <b>CGGAT</b> CCGCTACCGAACCTCGCACC    |                                          |
|                                                               | Cdc6H+PP1-KpnI                                                         | ATAG <b>GGT</b> ACCTCGTCGAATCTCGAACCG   |                                          |
| pBI501- <i>cdc6H</i>                                          | Cdc6H+FP1-BamHI                                                        | CG <b>CGGAT</b> CCCGAGGGTCTGGATTAGTTTC  |                                          |
|                                                               | Cdc6H-RP-KpnI                                                          | ATAG <b>GGT</b> ACCGGTCGTAACATAGAATCACA |                                          |
| pBI501- <i>oriP1-cdc6L</i>                                    | Cdc6L+FP-BamHI                                                         | CG <b>CGGAT</b> CCGTCATTCAGGTCTGGTATCG  |                                          |
|                                                               | Cdc6L+PP-NcoI                                                          | CATGCCAT <b>GGC</b> CTCGTATCCATCCTGCTC  |                                          |
| pBI501- <i>oriP2-cdc6M</i>                                    | Cdc6M+FP-BamHI                                                         | CG <b>CGGAT</b> CCCGGTGGGTATCCTCATCC    |                                          |
|                                                               | Cdc6M+PP-NcoI                                                          | CATGCCAT <b>GGG</b> AACTCTGCTGTGGACGGA  |                                          |
| pBI501- <i>oriP1-orc3</i>                                     | orc3+FP-BamHI                                                          | CG <b>CGGAT</b> CCAGACGAGTCGGCTGGTGA    |                                          |
|                                                               | orc3+RP-NcoI                                                           | CATGCCAT <b>GGT</b> TCCGCAGAGCAGGTCAA   |                                          |
| pBI501- <i>oriP2-orc13</i>                                    | orc13+FP-NcoI                                                          | CATGCCAT <b>GGG</b> GACGGCACATCACATACAA |                                          |
|                                                               | orc13+RP-KpnI                                                          | ATAG <b>GGT</b> ACCGCTGGGATCGGAATGATG   |                                          |
| pBI501- <i>oriP3-orc7</i>                                     | orc7+FP-NcoI                                                           | CATGCCAT <b>GGG</b> GTGTGGTTACCAGACTGAA |                                          |
|                                                               | orc7+RP-KpnI                                                           | ATAG <b>GGT</b> ACCGCAGGGCTTGGAACAGG    |                                          |
| pBI501- <i>orc4+</i>                                          | orc4+FP-NcoI                                                           | CATGCCAT <b>GGG</b> GGAGGAAGGAAGTCCG    |                                          |
|                                                               | orc4+RP-KpnI                                                           | ATAG <b>GGT</b> ACCCTGTTCTGTGGTTACTGCTC |                                          |
| Oligonucleotides for detection of gene disruption             |                                                                        |                                         |                                          |

|                                           |                               |
|-------------------------------------------|-------------------------------|
| Primer name                               | Sequence (5'-3')*             |
| cdc6Hdis-Pr1                              | the same as Cdc6H+FP1-BamHI   |
| cdc6Hdis-Pr2                              | ATCGCCTTCGGGAAGACT            |
| cdc6Hdis-Pr3                              | GCGAAGACCAGGGAGAAC            |
| cdc6Ldis-Pr1                              | the same as Cdc6L+FP-BamHI    |
| cdc6Ldis-Pr2                              | ATAGGGTACCCGAAGCAGCCCTACAACC  |
| cdc6Ldis-Pr3                              | the same as cdc6Hdis-Pr3      |
| Oligonucleotides for detection of origins |                               |
| Primer name                               | Sequence (5'-3')*             |
| oriC1-F                                   | CGCGGATCCTGTTTCGTCTCACCTTTCCT |
| oriC1-R                                   | CATGCCATGGGAAATCGGCCGGGTAGAAT |
| oriC2-F                                   | CGCGGATCCGGTTCATTTCATCAGGGTG  |
| oriC2-R                                   | ATAGGGTACCTCGAGGCTATTCAAAGGGA |
| oriC3-F                                   | CGCGGATCCCCTGCTTGTGGTGCTTCTC  |
| oriC3-R                                   | TCCTTTGAACCCGACTTCTC          |
| oriC4-F                                   | TGGATCGAGAGTCGACAGCT          |
| oriC4-R                                   | CAGTCTCGCTTGGAGTGTTG          |
| oriP2-orc13-F                             | the same as orc13+FP-NcoI     |
| oriP2-orc13-R                             | the same as orc13+FP2-EcoRV   |
| 7S-F                                      | ACTAGGTCGGGCAGTTAGG           |
| 7S-R                                      | CGAAGGACGAGTTTCTACG           |

\* Sequences representing restriction sites are highlighted in bold;

**Supplementary Table 2.** Location of putative origins from *H. volcanii* surveyed in our study

| Putative origins   | Replicon in wild isolate DS2 | Replicon in laboratory strain H26 | Location <sup>5</sup> |
|--------------------|------------------------------|-----------------------------------|-----------------------|
| <i>oriP1-orc3</i>  | pHV4                         | chromosome                        | 635565-635786&1-1533* |
| <i>oriP2-orc13</i> | pHV4                         | chromosome                        | 55221-57786*          |
| <i>oriP3-orc7</i>  | pHV4                         | chromosome                        | 257317-259691*        |
| <i>orc4+</i>       | chromosome                   | chromosome                        | 1887008-1889595*      |

\* Numbering refers to the pHV4 or chromosome position of *H. volcanii* DS2.

## Supplementary References

1. Liu X, Wang L, Liu J, Cai L, Xiang H. Genome-wide analysis of gene expression in stationary phase and genetic characterization of stationary-phase-dependent halocin gene expression in the haloarchaeon *Haloferax mediterranei*. *J. Genet. Genomics* **40**, 441-444 (2013).
2. Sun CM, Zhou MX, Li Y, Xiang H. Molecular characterization of the minimal replicon and the unidirectional theta replication of pSCM201 in extremely halophilic archaea. *J. Bacteriol.* **188**, 8136-8144 (2006).
3. Miao D, Sun C, Xiang H. [Construction and application of a novel shuttle expression vector based on haloarchaeal plasmid pSCM201]. *Wei Sheng Wu Xue Bao* **49**, 1040-1047 (2009).
4. Brendel J, *et al.* A complex of Cas proteins 5, 6, and 7 is required for the biogenesis and stability of clustered regularly interspaced short palindromic repeats (CRISPR)-derived RNAs (crRNAs) in *Haloferax volcanii*. *J. Biol. Chem.* **289**, 7164-7177 (2014).
5. Hartman AL, *et al.* The complete genome sequence of *Haloferax volcanii* DS2, a model archaeon. *PLoS One* **5**, e9605 (2010).
